# Supplementary material for: Effect of Functionalization of Reduced Graphene Oxide Coatings with Nitrogen and Sulfur Groups on Their Anti-Corrosion Properties
Source: MDPI journal article supplement (doi:10.3390/ma14061410), 2021-03-14
Supplement: s1 [file s1]

# Effect of functionalization of reduced graphene oxide coatings with nitrogen and sulfur groups on their anti-corrosion properties

Karolina Ollik <sup>1\*</sup>, Jakub Karczewski <sup>2</sup>, Marek Lieder <sup>1</sup>

<sup>1</sup> Department of Process Engineering and Chemical Technology, Faculty of Chemistry, Gdansk University of Technology, 11/12 Gabriela Narutowicza Street, 80-233 Gdansk,

<sup>2</sup> Department of Solid State Physics, Faculty of Applied Physics and Mathematics, Gdansk University of Technology, 11/12 Gabriela Narutowicza Street, 80-233 Gdansk,

\* Correspondence: karolina.ollik@pg.edu.pl; 58 347 12 75

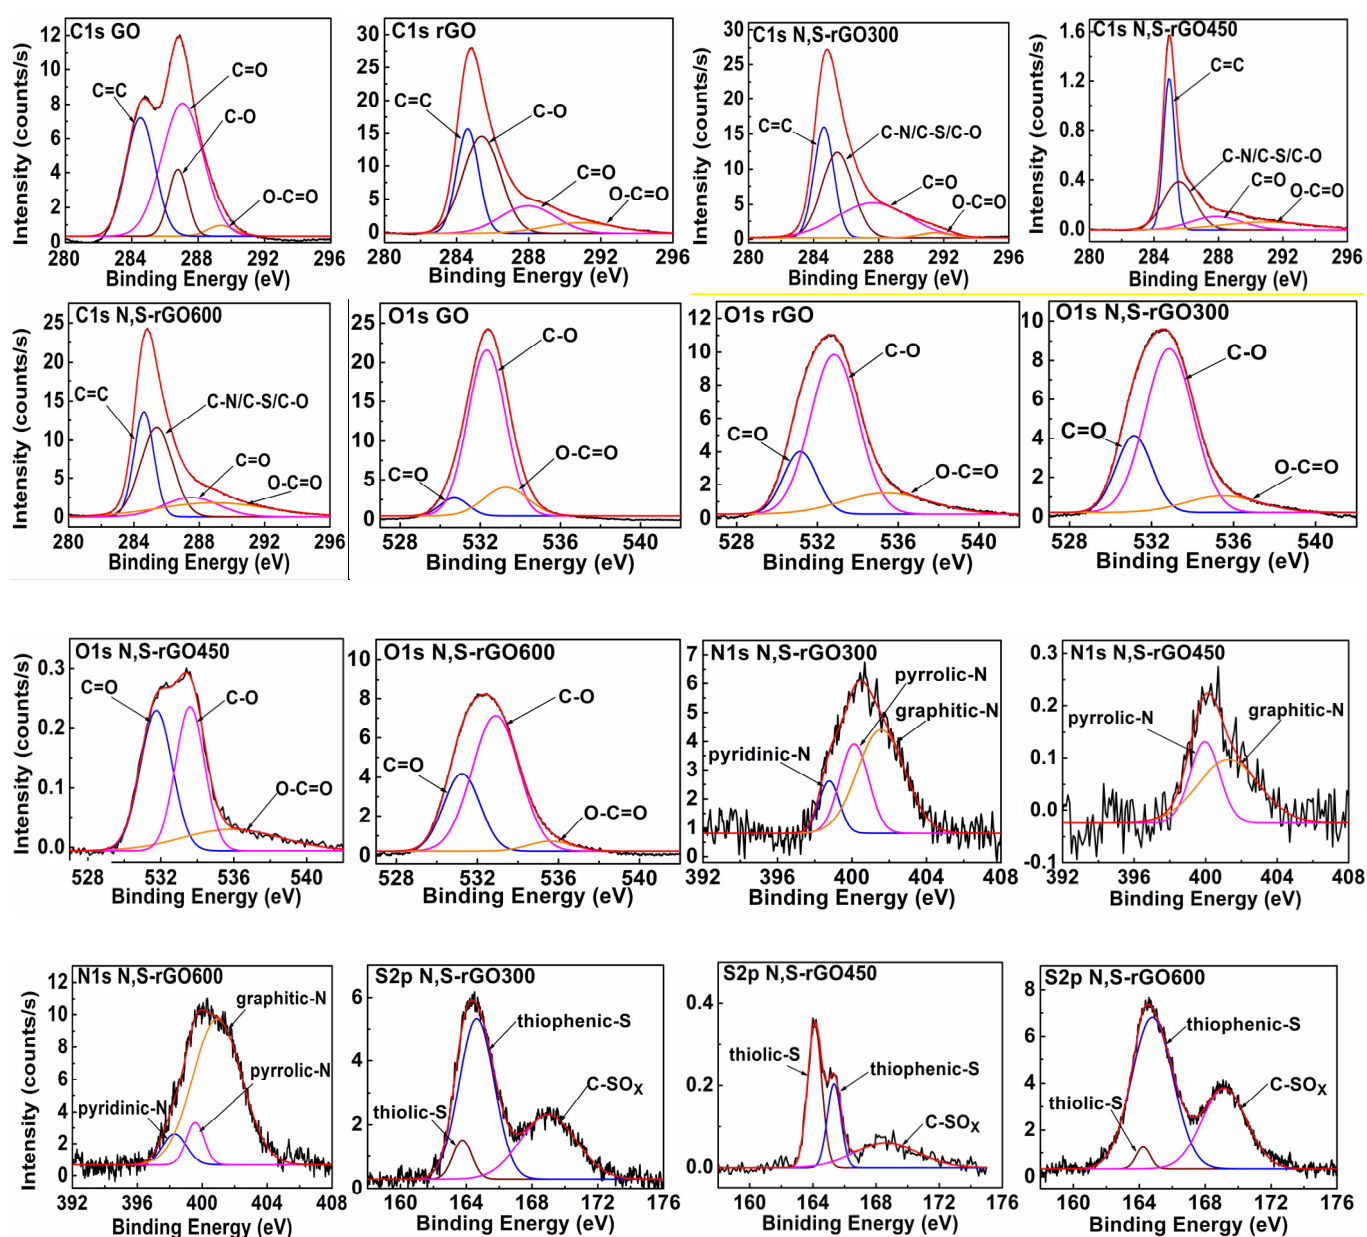

Figure S1. XPS spectra for precursors of coatings.

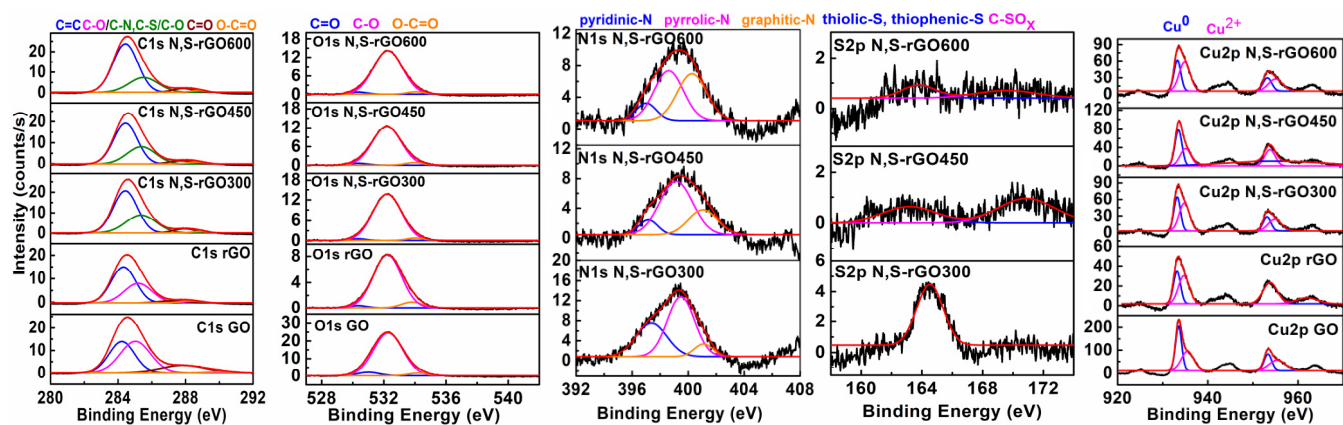

Figure S2. XPS spectra for graphene coatings.
